# Supplementary material for: Silencing of six susceptibility genes results in potato late blight resistance
Source: PubMed Central journal article supplement (PMC5023794; doi:10.1007/s11248-016-9964-2), 2016-05-28
Supplement: 11248_2016_9964_MOESM1_ESM.pdf [file 11248_2016_9964_MOESM1_ESM.pdf]

**Supplementary Fig. 1.** Individual phylogenetic trees of all 11 candidate susceptibility genes (*S*-genes) including homologs from tomato and potato. Sequences with an asterisk (\*) which showed the highest degree of homology with the Arabidopsis *S*-gene were considered as the orthologs in potato. These are highlighted in orange, or in green in the case of multiple Arabidopsis *S*-genes in the same tree. The scale bar indicates amino acid substitutions per position. In the trees, the numbers above nodes indicate bootstrap support values based on 10,000 replicates.

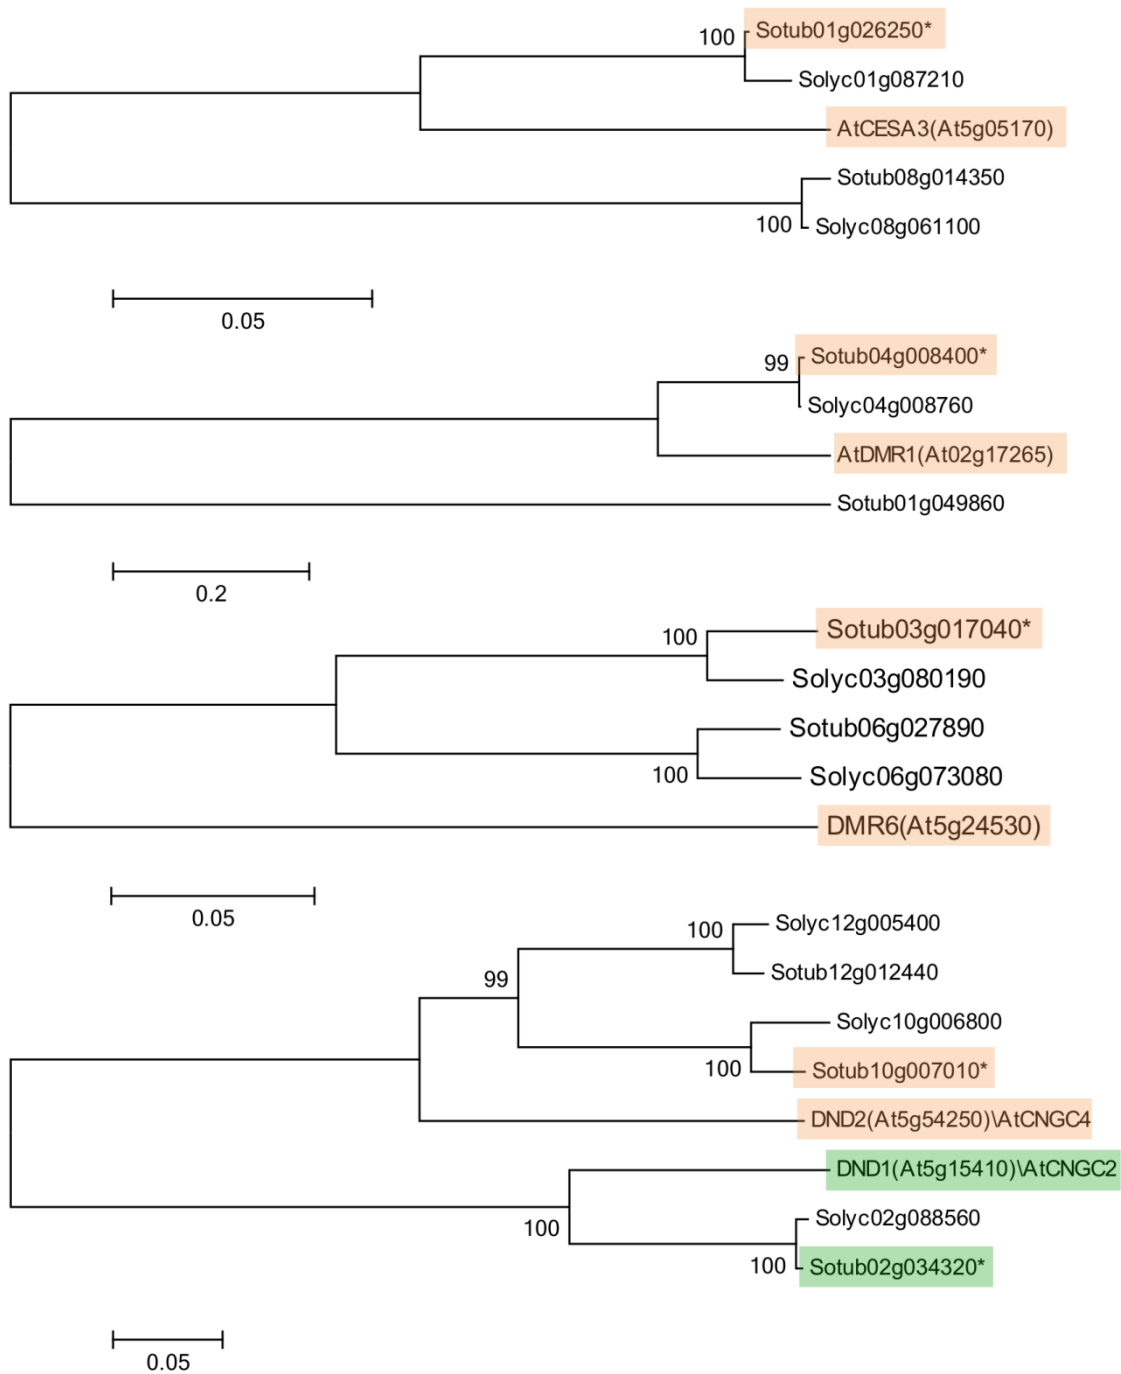

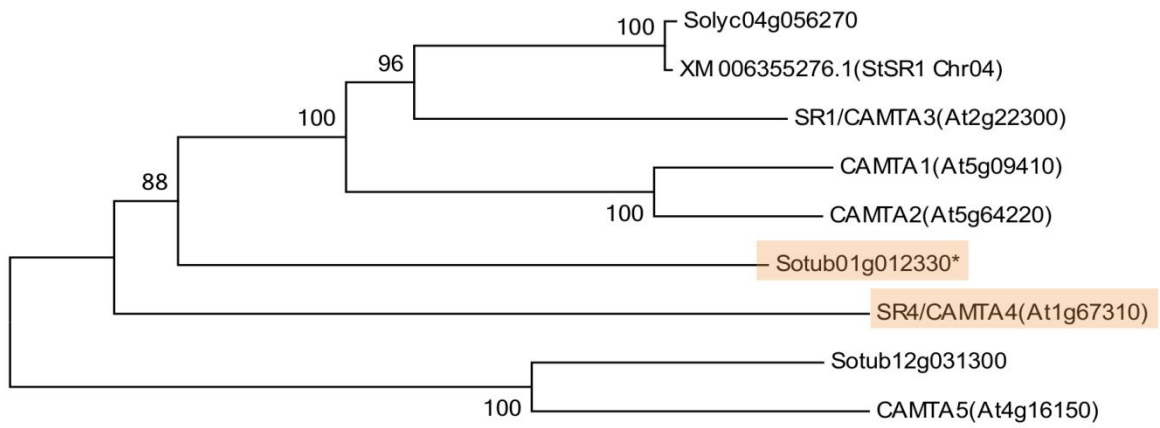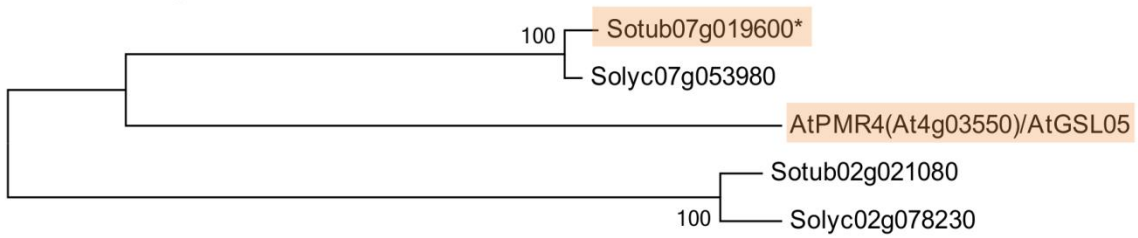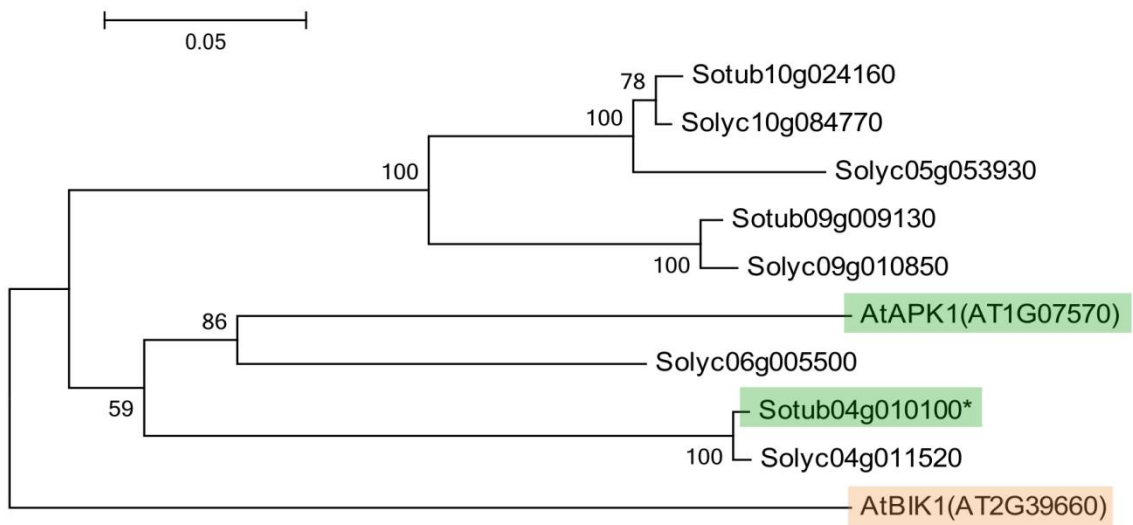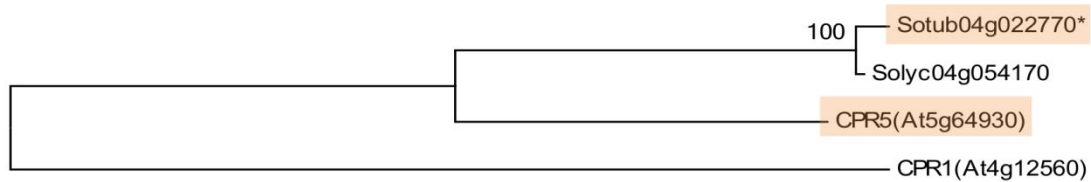

0.2

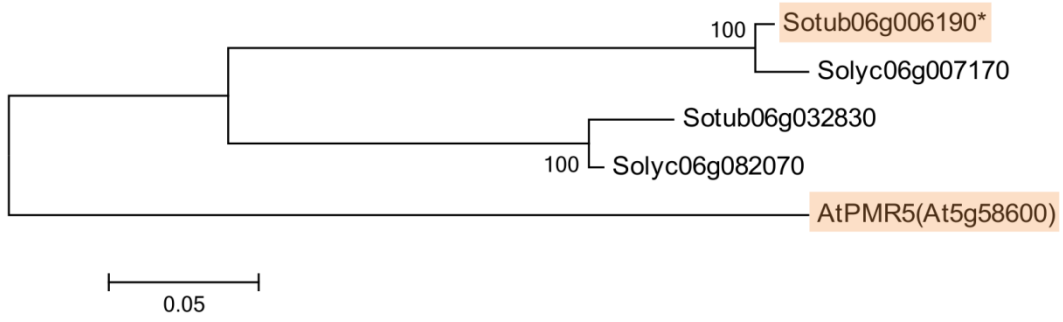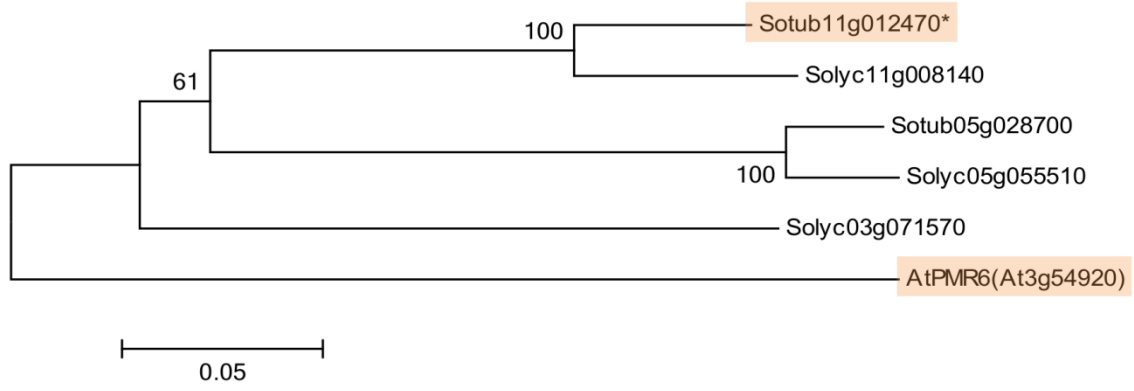

**Supplementary Fig. 2.** Information of RNAi silencing constructs and silencing effects in RNAi potato transformants. Location of the targeted regions of the RNAi constructs and qPCR fragments in 11 susceptibility genes (*S*-genes). Relative expression level of 11 potential *S*-genes in leaves of Desiree and independent potato RNAi transformants. Asterisks indicate degree of significant difference compared to Desiree plants (\* $p < 0.05$ , \*\* $p < 0.01$ , \*\*\* $p < 0.001$ )

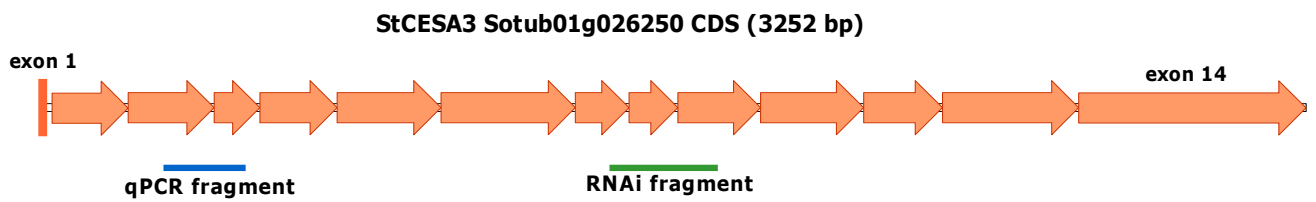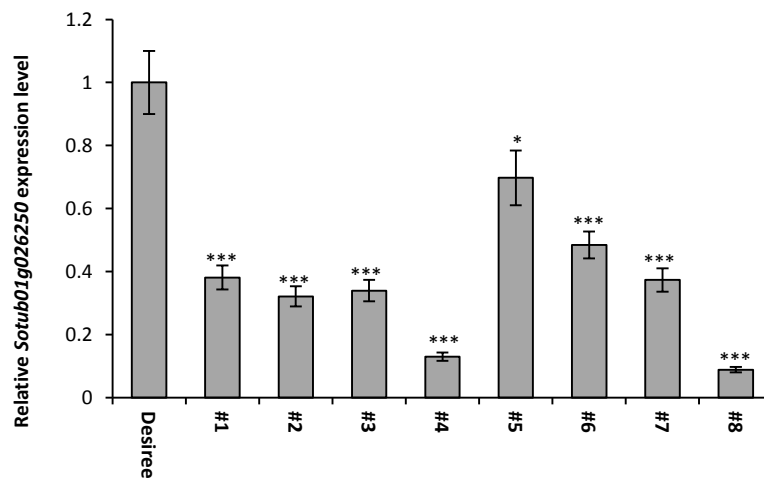

### StDMR1 Sotub04g008400 CDS (1131 bp)

exon 1

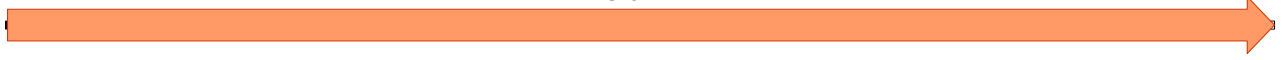

RNAi fragment      qPCR fragment

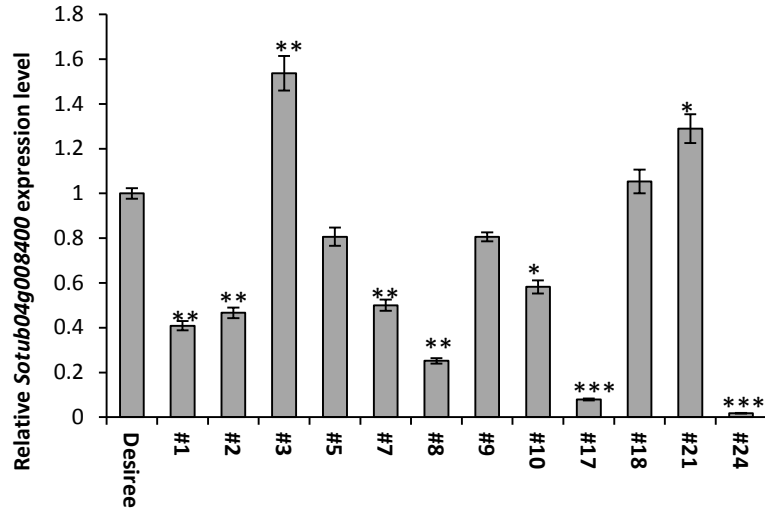

### StDMR6 Sotub03g017040 CDS (1014 bp)

exon 1

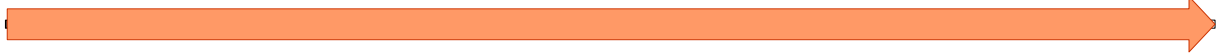

qPCR fragment

RNAi fragment

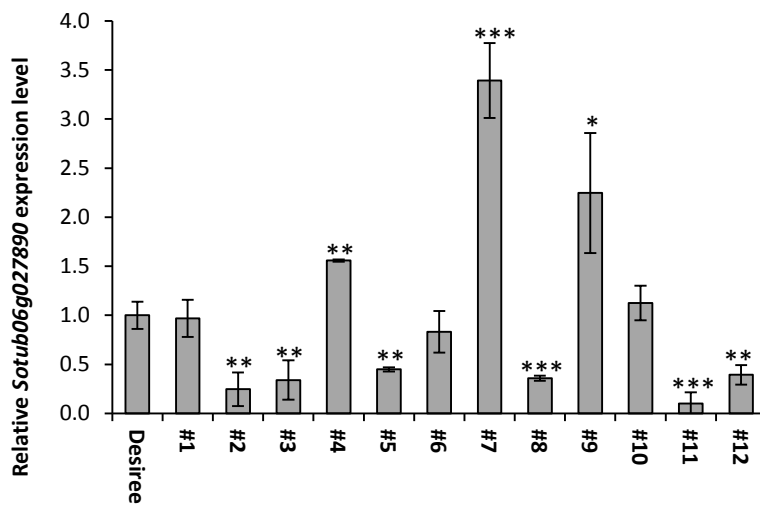

**StDND1 Sotub02g034320 CDS (2127 bp)**

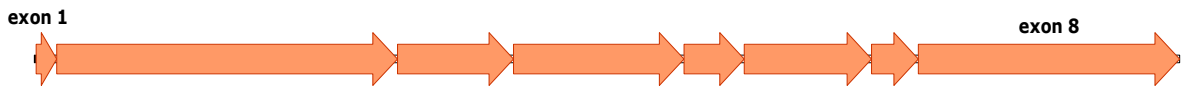

RNAi fragment (green bar)  
qPCR fragment (blue bar)

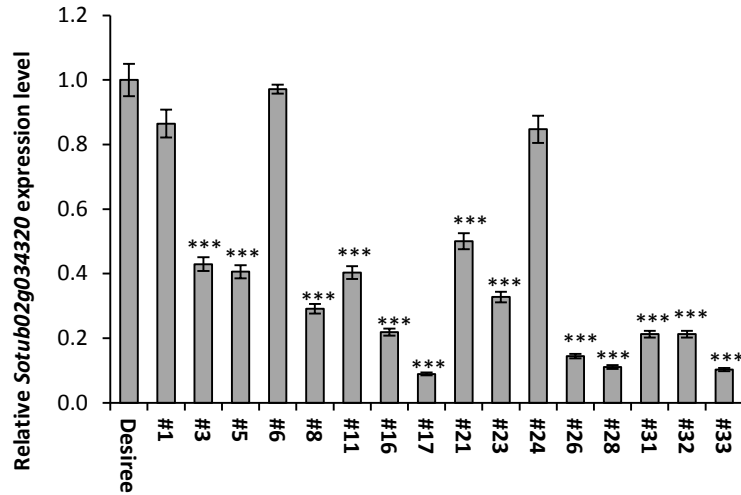

**PGSC0003DMT400038758 (2903 bp)**

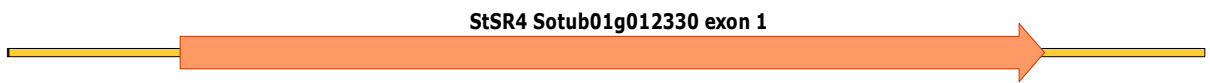

RNAi fragment (green bar)  
qPCR fragment (blue bar)

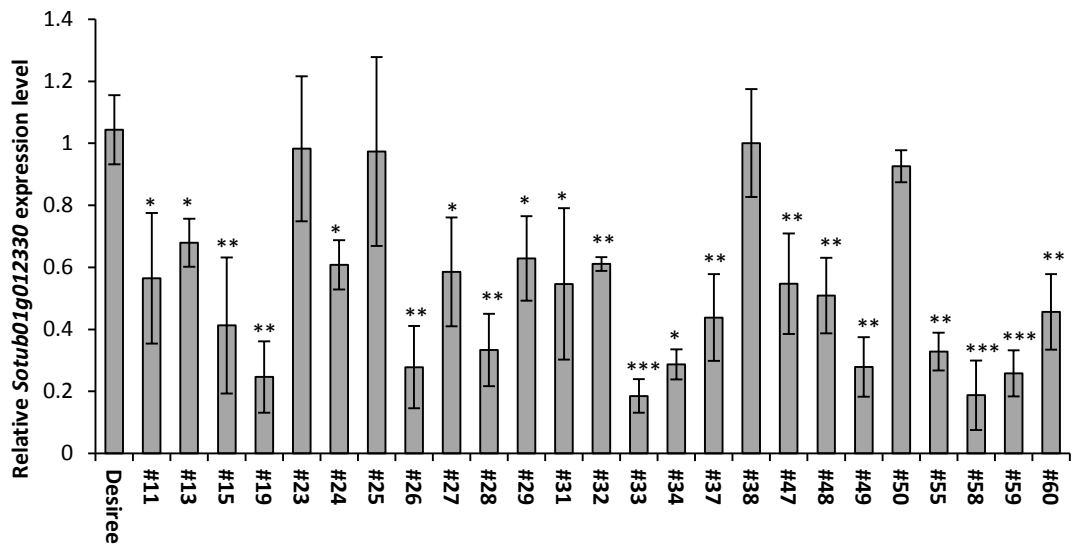

**StPMR4 Sotub07g019600 CDS (5214 bp)**

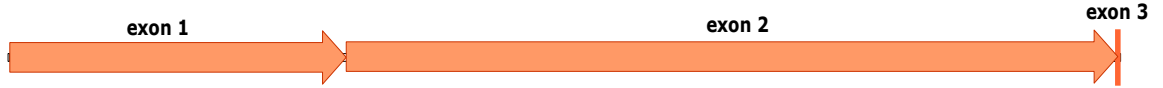

RNAi fragment qPCR fragment

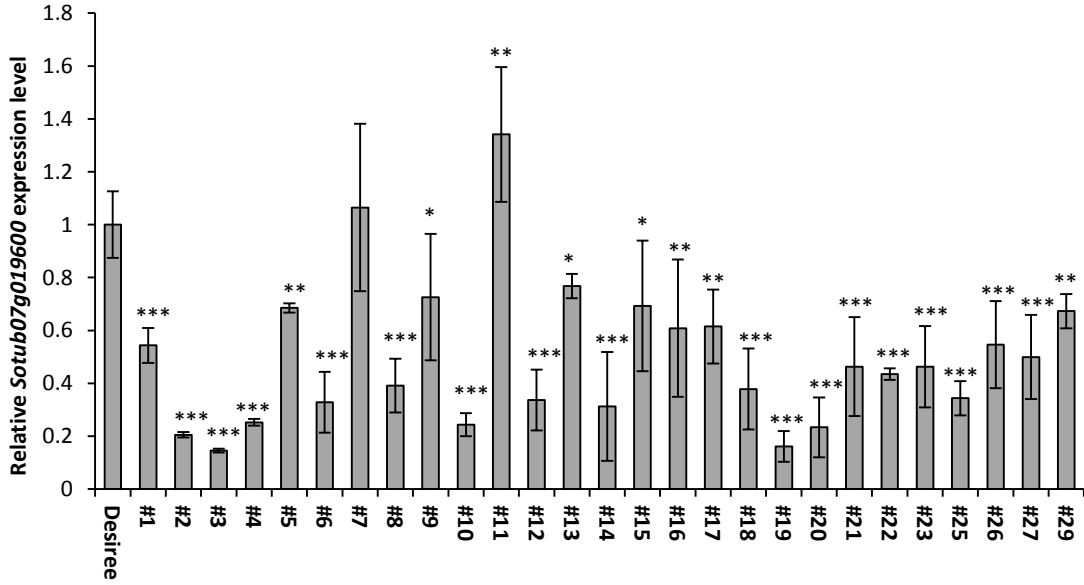

**StBIK1/StAPK1 Sotub04g010100 CDS (1185 bp)**

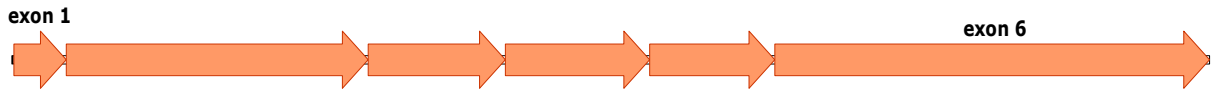

RNAi fragment

qPCR fragment

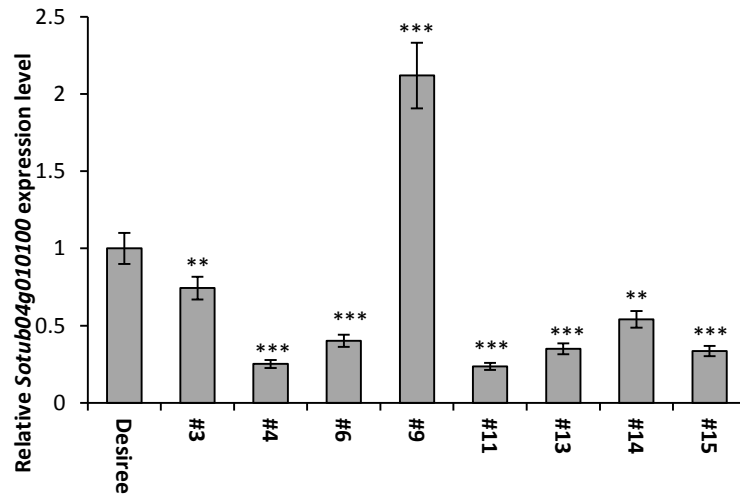

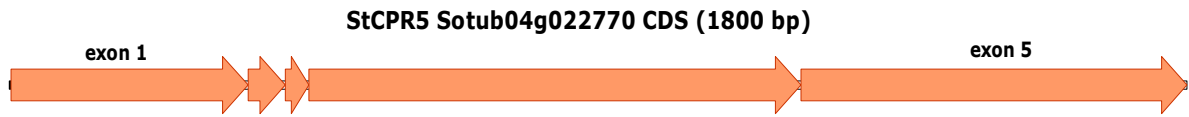

RNAi fragment

qPCR fragment

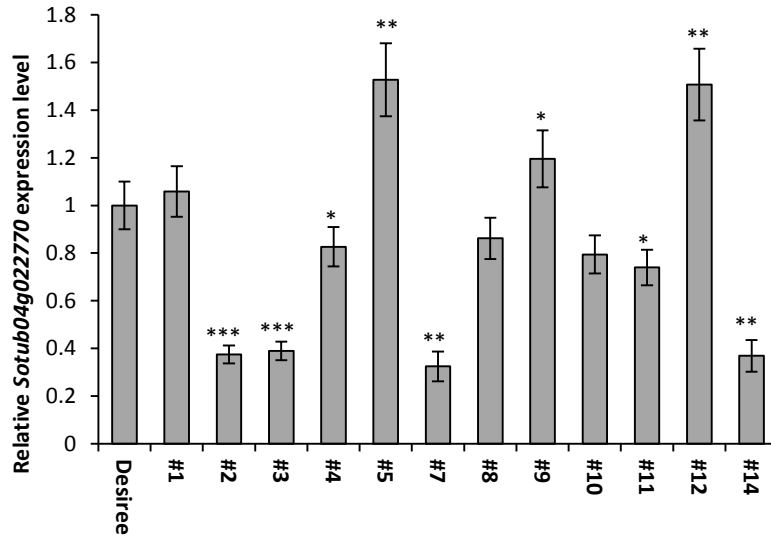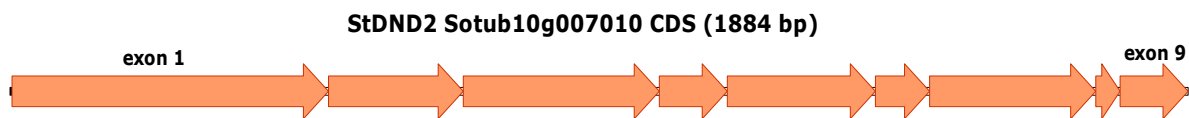

RNAi fragment

qPCR fragment

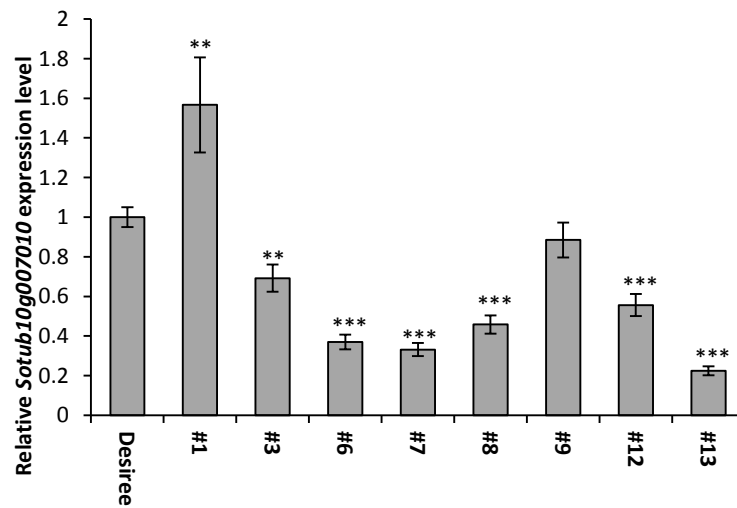



**StPMR5 Sotub06g006190 CDS (1200 bp)**

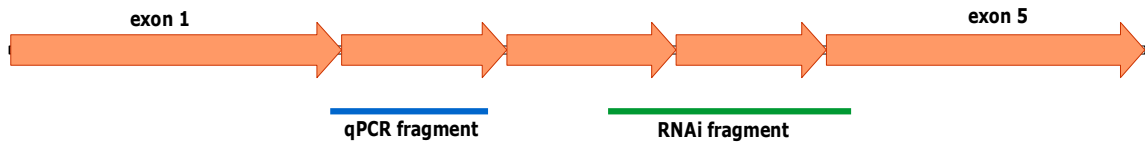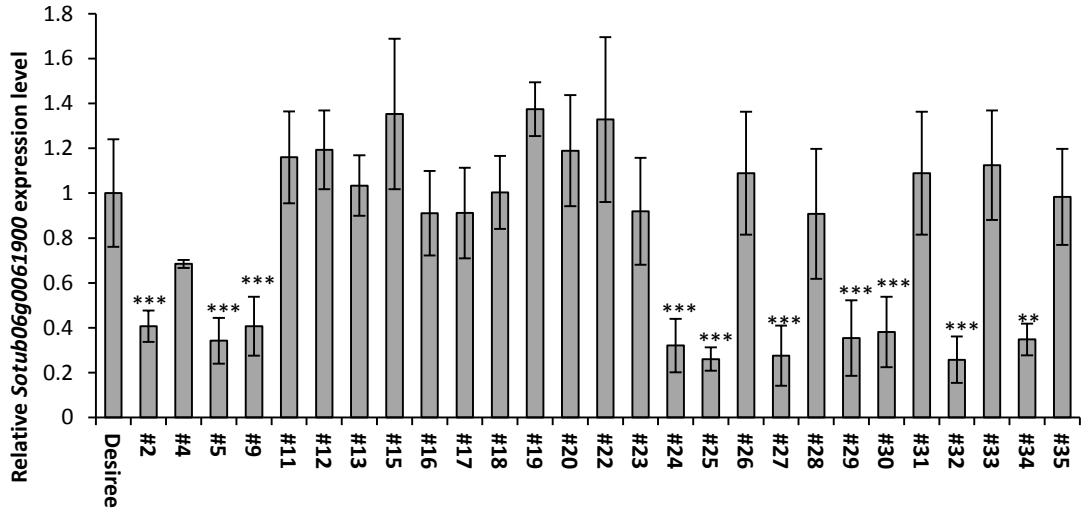

**StPMR6 Sotub05g015080 CDS (1206 bp)**

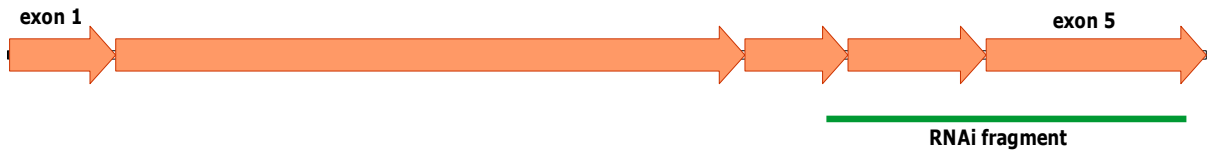

**StPMR6 Sotub11g012470 CDS (1473 bp)**

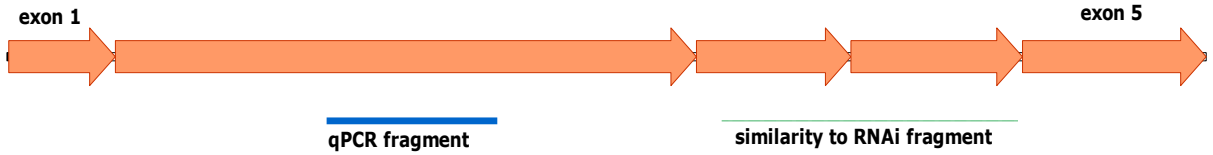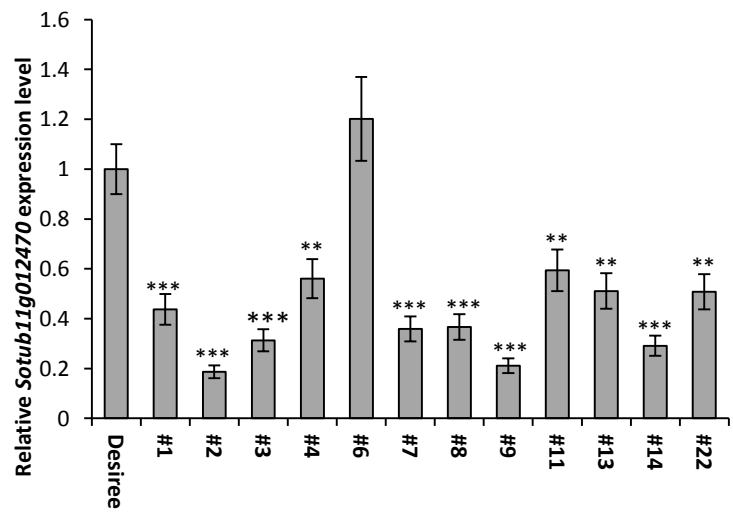

**Supplementary Table 1. Primers used in this study**

| Primer name     | Sequence (5' to 3')                                                                                            | Used for                               | Gene                                        |
|-----------------|----------------------------------------------------------------------------------------------------------------|----------------------------------------|---------------------------------------------|
| Fw-SICESA3      | caccGCACACCATGGCCTGGAAATAACACC                                                                                 | RNAi:: SICESA3 cloning                 | Solyc01g087210                              |
| Rv-SICESA3      | AAAAGCACATTGCTTCTCTCAAAGCC                                                                                     |                                        |                                             |
| Fw-StCESA3-qPCR | GAAGCAAAAAGTGGCTGACC                                                                                           | Determining relative transcript levels | Sotub01g026250                              |
| Rv-StCESA3-qPCR | GATGTGTTTTGCACCACCAG                                                                                           |                                        |                                             |
| Fw-SIDMR1       | caccAGTCGTTTGCTCCGGCCACTG                                                                                      | RNAi:: SIDMR1 cloning                  | Solyc04g008760                              |
| Rv-SIDMR1       | CGCCGCAGCACTAGCAGCAC                                                                                           |                                        |                                             |
| Fw-StDMR1-qPCR  | TGGACGGAAGTTGAGTGTTG                                                                                           | Determining relative transcript levels | Sotub01g026250                              |
| Rv-StDMR1-qPCR  | CCCTCATCTTCTTGTTGGA                                                                                            |                                        |                                             |
| Fw-SIDND1       | caccTGTCTTCTACCAAGACGTCCGC                                                                                     | RNAi:: SIDND1 cloning                  | Solyc02g088560                              |
| Rv-SIDND1       | CGATGTGTGCCGGCTGCGAC                                                                                           |                                        |                                             |
| Fw-StDND1-qPCR  | GTTCCGGCGTGTATTAGACC                                                                                           | Determining relative transcript levels | Sotub02g034320                              |
| Rv-StDND1-qPCR  | GAATCACCGTGACGATAGCC                                                                                           |                                        |                                             |
| Fw-SIDMR6       | caccTCATCTTTCAGGGAATCGTGAGCAG                                                                                  | RNAi:: SIDMR6 cloning                  | Solyc03g080190                              |
| Rv-SIDMR6       | TGACAAAGGCGTCAGGTTGAGG                                                                                         |                                        |                                             |
| Fw-StDMR6-qPCR  | AGTTACATCCGACCCGAATC                                                                                           | Determining relative transcript levels | Sotub06g027890                              |
| Rv-StDMR6-qPCR  | GACGGATTATTTGAGCTTGGTC                                                                                         |                                        |                                             |
| Fw-StSR4        | caccAGAATAGGTGCCTCCCGTCT                                                                                       | RNAi:: StSR4 cloning                   | PGSC0003DMT4<br>00038758/<br>Sotub01g012330 |
| Rv-StSR4        | GCGACCTCGAGAACTCCATA                                                                                           |                                        |                                             |
| Fw-StSR4-qPCR   | CTGGTAAAGCTCTGGCGAAC                                                                                           | Determining relative transcript levels | Sotub01g012330                              |
| Rv-StSR4-qPCR   | GCAGTCTCCACCGATCTCTC                                                                                           |                                        |                                             |
|                 | ATGAGCCTCCGGCAACGTTCAACGCCGGC<br>GGCGAGACAAGTTTCTATAGATGAAGAAC<br>CATATAACATCATTCCGATTCATAATCTTC<br>TAGCTGACC* | RNAi:: SIPMR4 cloning                  | Solyc07g053980                              |
| Fw-StPMR4-qPCR  | GGGGTGAGTCAGCGAATCTA                                                                                           | Determining relative transcript levels | Sotub07g019600                              |
| Rv-StPMR4-qPCR  | GGGCAGTACCATTCCGACTA                                                                                           |                                        |                                             |
| Fw-SIBIK1       | caccAGCTGCAAGGCCAGGGACTG                                                                                       | RNAi:: SIBIK1 cloning                  | Solyc04g011520                              |
| Rv-SIBIK1       | AGCTGCCTCGAGAGCAACCTTC                                                                                         |                                        |                                             |
| Fw-StBIK1-qPCR  | TCGTTCGAGTGATGGACAAAA                                                                                          | Determining relative transcript levels | Sotub04g010100                              |
| Rv-StBIK1-qPCR  | CAGGCATTTGACAGCAAGAA                                                                                           |                                        |                                             |
| Fw-SICPR5       | caccTCTCAACCCGTCGATCCGCC                                                                                       | RNAi:: SICPR5 cloning                  | Solyc04g054170                              |
| Rv-SICPR5       | TGCCGAGAGGAAGTGCAAGTG                                                                                          |                                        |                                             |
| Fw-StCPR5-qPCR  | GCAATTGGCTTCTGCTTCTT                                                                                           | Determining relative transcript levels | Sotub04g022770                              |
| Rv-StCPR5-qPCR  | CTCTCCAAAAGGTTTCGCATC                                                                                          |                                        |                                             |
| Fw-StDND2       | caccTGACGATGAAGATGAAGATGATG                                                                                    | RNAi:: StDND2 cloning                  | Sotub10g007010                              |
| Rv-StDND2       | CCCATTGTGCTTTAGGGTCT                                                                                           |                                        |                                             |
| Fw-StDND2-qPCR  | TTTGCCTCTTGAGAAGAATGC                                                                                          | Determining relative transcript levels | Sotub10g007010                              |
| Rv-StDND2-qPCR  | ATTTGGCTGCCCTTTGAATA                                                                                           |                                        |                                             |
| Fw-SIPMR5       | caccTGCTTGGAGAGGTGTTGATGTCTTG                                                                                  | RNAi:: SIPMR5 cloning                  | Solyc06g007170                              |
| Rv-SIPMR5       | ACGTGCCGGTGGTCCAATCG                                                                                           |                                        |                                             |
| Fw-StPMR5-qPCR  | TGAAATTCCAAGGTTCAATGG                                                                                          | Determining relative transcript levels | Sotub06g006190                              |
| Rv-StPMR5-qPCR  | GAGGGTCACCCGTGATGTAT                                                                                           |                                        |                                             |

\*Artificial sequence

**Supplementary Table 1 (continued)**

| Primer name    | Sequence (5' to 3')           | Used for                               | Gene           |
|----------------|-------------------------------|----------------------------------------|----------------|
| Fw-SIPMR6      | caccGGCTTGTGCAAAGGATGCCAAGATG | RNAi:: SIPMR6 cloning                  | Solyc05g014000 |
| Rv-SIPMR6      | TGCAACCAAGTGCACCAGCATTC       |                                        |                |
| Fw-StPMR6-qPCR | CCGTAATCCAGGAAGAACCA          | Determining relative transcript levels | Sotub11g012470 |
| Rv-StPMR6-qPCR | TATCCCCGACGGTAAACAG           |                                        |                |
| Fw-NPT II      | ACTGGGCACAACAGACAATC          | Verification of transgenic plants      |                |
| Rv-NPT II      | TCGTCCTGCAGTTCATTCAG          |                                        |                |
| Fw-StEF1a      | ATTGGAAATGGATATGCTCCA         | Normalisation in qRT-PCR assays        | Sotub06g010680 |
| Rv-StEF1a      | TCCTTACCTGAACGCCTGTCA         |                                        |                |

**Supplementary Table 2.** Details of susceptibility genes identified in Arabidopsis

| Gene name    | Subcellular location                                                                                              | Function                                                   | Susceptibility mechanism                                                                                                | References                                                                                                                                 |
|--------------|-------------------------------------------------------------------------------------------------------------------|------------------------------------------------------------|-------------------------------------------------------------------------------------------------------------------------|--------------------------------------------------------------------------------------------------------------------------------------------|
| <i>CESA3</i> | Golgi apparatus, endosome, integral component of membrane, plasma membrane, plasmodesma, trans-Golgi network      | Cellulose synthase                                         | Probably DAMP induced defense suppression (JA, ET)                                                                      | Ellis et al. (2002); Ellis and Turner (2001)                                                                                               |
| <i>DMR1</i>  | Chloroplast, chloroplast stroma                                                                                   | Homoserine kinase                                          | Amino acid metabolism                                                                                                   | Huibers et al. (2013); Van Damme et al. (2005); van Damme et al. (2009)                                                                    |
| <i>DMR6</i>  | Cytoplasm                                                                                                         | 2-oxoglutarate-Fe oxygenase                                | Defense suppression (SA?)                                                                                               | Van Damme et al. (2005); Van Damme et al. (2008)                                                                                           |
| <i>DND1</i>  | Plasma membrane                                                                                                   | Cyclic nucleotide-gated ion channel                        | Defense suppression (SA, JA), regulator NO synthesis                                                                    | Ahn (2007); Clough et al. (2000); Genger et al. (2008); Govrin and Levine (2000); Jurkowski et al. (2004); Su'udi et al. (2011)            |
| <i>SRI</i>   | Nucleus                                                                                                           | Ca <sup>2+</sup> /calmoduline-binding transcription factor | Defense suppression (SA, ET)                                                                                            | Doherty et al. (2009); Du et al. (2009); Galon et al. (2008); Kim et al. (2013); Laluk et al. (2012); Nie et al. (2012); Qiu et al. (2012) |
| <i>PMR4</i>  | 1,3-beta-D-glucan synthase complex, Golgi apparatus, integral component of membrane, plasma membrane, plasmodesma | Callose synthase                                           | Probably DAMP induced defense suppression (SA, JA)                                                                      | Nishimura et al. (2003)                                                                                                                    |
| <i>BIK1</i>  | Chloroplast, cytoplasm, nucleolus, nucleus, plasma membrane                                                       | Membrane-anchored protein kinase                           | Defense suppression PTI (SA?, ET)                                                                                       | Veronese et al. (2006)                                                                                                                     |
| <i>CPR5</i>  | Chloroplast, integral component of membrane, membrane, nucleus                                                    | Transmembrane protein                                      | Defense suppression (SA, JA, ET)                                                                                        | Bowling et al. (1997); Jing et al. (2007); Jing and Dijkwel (2008); Love et al. (2007)                                                     |
| <i>DND2</i>  | Integral component of plasma membrane, membrane, plasma membrane                                                  | Cyclic nucleotide-gated ion channel                        | Defense suppression (SA, JA), regulator NO synthesis                                                                    | Ahn (2007); Clough et al. (2000); Genger et al. (2008); Govrin and Levine (2000); Jurkowski et al. (2004); Su'udi et al. (2011)            |
| <i>PMR5</i>  | Endoplasmic reticulum, integral component of membrane                                                             | Unknown                                                    | Altered pectin composition of cell wall affecting either nutrition or endoreduplication                                 | Chandran et al. (2013); Vogel et al. (2004)                                                                                                |
| <i>PMR6</i>  | Anchored component of membrane, anchored component of plasma membrane, plasma membrane                            | Pectate lyase-like protein                                 | Pectin accumulation in the extrahaustorial matrix possibly resulting in decreased nutrient availability to the pathogen | Chandran et al. (2013); Vogel et al. (2002)                                                                                                |
